# Supplementary material
Source: Springer Nature journal article supplement (https://www.springermedizin.de/resource/supplementary/12985_2010_967_MOESM1_ESM.pdf/9608846)

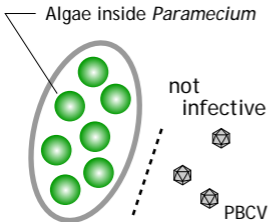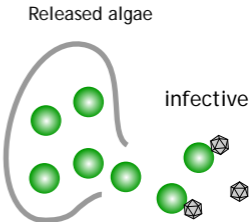

U.S.\* *Paramecium*

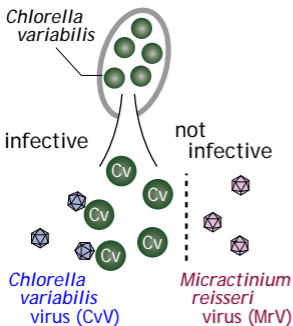

European *Paramecium*

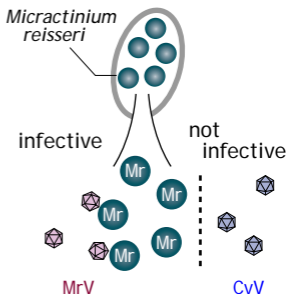

Supplement: MOESM1 [file 9608846]
